# Supplementary material
Source: Springer Nature journal article supplement (https://www.springermedizin.de/resource/supplementary/12889_2007_1165_MOESM4_ESM.pdf/9502594)

■ Census ■ Survey sample

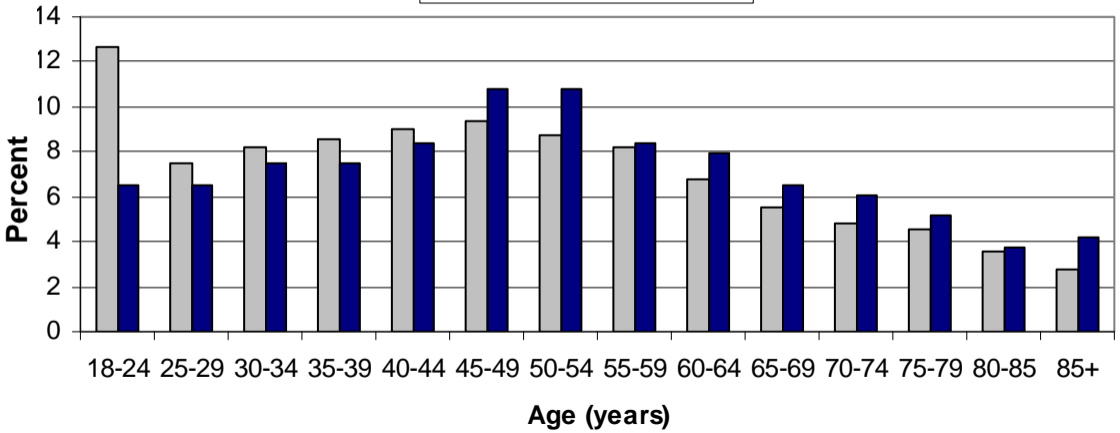

Supplement: MOESM4 [file 9502594]
